# Supplementary material for: A Machine Learning Approach for Hot-Spot Detection at Protein-Protein Interfaces
Source: MDPI journal article supplement (doi:10.3390/ijms17081215), 2016-07-27
Supplement: s1 [file s1]

# Supplementary Mateirlas: A Machine Learning Approach for Hot-Spot Detection at Protein-Protein Interfaces

Rita Melo, Robert Fieldhouse, André Melo, João D. G. Correia, Maria Natália N. D. S. Cordeiro, Zeynep H. Gümüş, Joaquim Costa, Alexandre M. J. J. Bonvin and Irina S. Moreira

**Table S1.**  $\Delta\Delta G_{\text{binding}}$  experimental values/HotSpot(HS)-NullSpots(NS) classification for the residues at our dataset.

| Complex                           | CPX_PDBID | Reference | Mutation |       |                  |
|-----------------------------------|-----------|-----------|----------|-------|------------------|
|                                   |           |           | Residue  | Chain | $\Delta\Delta G$ |
| Ribonuclease Inhibitor/Angiogenin | 1A4Y      | [47]      | TRP      | 261   | 0.10             |
|                                   |           |           | TRP      | 263   | 1.20             |
|                                   |           |           | SER      | 289   | 0.00             |
|                                   |           |           | TRP      | 318   | 1.50             |
|                                   |           |           | LYS      | 320   | −0.30            |
|                                   |           |           | GLU      | 344   | 0.20             |
|                                   |           |           | TRP      | 375   | 1.00             |
|                                   |           |           | GLU      | 401   | 0.90             |
|                                   |           |           | TYR      | 434   | 3.30             |
|                                   |           |           | ASP      | 435   | 3.50             |
|                                   |           |           | TYR      | 437   | 0.80             |
|                                   |           |           | ARG      | 457   | −0.20            |
|                                   |           |           | ILE      | 459   | 0.70             |
|                                   |           |           | ARG      | 5     | 2.30             |
|                                   |           |           | HIS      | 8     | 0.90             |
|                                   |           |           | GLN      | 12    | 0.30             |
|                                   |           |           | HIS      | 13    | −0.30            |
|                                   |           |           | ARG      | 31    | 0.20             |
|                                   |           |           | ARG      | 32    | 0.90             |
|                                   |           |           | ASN      | 68    | 0.20             |
| Tissue Factor/Fab(5G9)            | 1AHW      | [48]      | HIS      | 84    | 0.20             |
|                                   |           |           | TRP      | 89    | 0.20             |
|                                   |           |           | GLU      | 108   | −0.30            |
|                                   |           |           | HIS      | 114   | 0.65             |
|                                   |           |           | TYR      | 156   | 4.00             |
|                                   |           |           | THR      | 167   | 0.00             |
|                                   |           |           | THR      | 170   | 1.00             |
|                                   |           |           | LEU      | 176   | 1.00             |
|                                   |           |           | ASP      | 178   | −0.50            |
|                                   |           |           | THR      | 197   | 1.30             |
|                                   |           |           | VAL      | 198   | −0.30            |

Table S1. Cont.

| Complex                                                          | CPX_PDBID | Reference | Mutation |       |                  |
|------------------------------------------------------------------|-----------|-----------|----------|-------|------------------|
|                                                                  |           |           | Residue  | Chain | $\Delta\Delta G$ |
| Barnase/barnstar                                                 | 1BRS      | [49]      | LYS      | 27    | 5.40             |
|                                                                  |           |           | ARG      | 59    | 5.20             |
|                                                                  |           |           | GLU      | 60    | −0.20            |
|                                                                  |           |           | GLU      | 73    | 2.80             |
|                                                                  |           |           | ARG      | 87    | 5.50             |
|                                                                  |           |           | HIS      | 102   | 6.00             |
|                                                                  |           |           | TYR      | 29    | 3.40             |
|                                                                  |           |           | ASP      | 35    | 4.50             |
|                                                                  |           |           | ASP      | 39    | 7.70             |
|                                                                  |           |           | THR      | 42    | 1.80             |
|                                                                  |           |           | GLU      | 76    | 1.30             |
| E. coli colicin E9 dnase domain/<br>cognate immunity protein IM9 | 1BXI      | [50]      | CYS      | 23    | 0.92             |
|                                                                  |           |           | ASN      | 24    | 0.14             |
|                                                                  |           |           | THR      | 27    | 0.73             |
|                                                                  |           |           | SER      | 28    | 0.17             |
|                                                                  |           |           | SER      | 29    | 0.96             |
|                                                                  |           |           | GLU      | 30    | 1.14             |
|                                                                  |           |           | LEU      | 33    | 3.42             |
|                                                                  |           |           | VAL      | 34    | 2.58             |
|                                                                  |           |           | VAL      | 37    | 1.66             |
|                                                                  |           |           | THR      | 38    | 0.90             |
|                                                                  |           |           | GLU      | 41    | 2.08             |
|                                                                  |           |           | SER      | 48    | 0.01             |
|                                                                  |           |           | GLY      | 49    | 1.49             |
|                                                                  |           |           | SER      | 50    | 2.19             |
|                                                                  |           |           | ASP      | 51    | 5.92             |
|                                                                  |           |           | TYR      | 55    | 4.63             |
|                                                                  |           |           | PRO      | 56    | 1.24             |
| Bovine $\alpha$ -chymotrypsin/BPTI                               | 1CBW      | [51]      | THR      | 11    | 0.20             |
|                                                                  |           |           | LYS      | 15    | 2.00             |
|                                                                  |           |           | ARG      | 17    | 0.50             |
|                                                                  |           |           | ILE      | 19    | 0.10             |
|                                                                  |           |           | VAL      | 34    | 0.00             |
|                                                                  |           |           | ARG      | 39    | 0.20             |

Table S1. Cont.

| Complex                           | CPX_PDBID | Reference | Mutation |       |                  |
|-----------------------------------|-----------|-----------|----------|-------|------------------|
|                                   |           |           | Residue  | Chain | $\Delta\Delta G$ |
| Factor VIIA/Tissue factor         | 1DAN      | [52]      | LYS      | 15    | −0.40            |
|                                   |           |           | THR      | 17    | 0.10             |
|                                   |           |           | ASN      | 18    | 0.20             |
|                                   |           |           | LYS      | 20    | 2.60             |
|                                   |           |           | THR      | 21    | −0.20            |
|                                   |           |           | ILE      | 22    | 0.70             |
|                                   |           |           | GLU      | 24    | 0.70             |
|                                   |           |           | LYS      | 41    | −0.04            |
|                                   |           |           | SER      | 42    | −0.05            |
|                                   |           |           | ASP      | 44    | 0.70             |
|                                   |           |           | LYS      | 46    | 0.25             |
|                                   |           |           | SER      | 47    | 0.05             |
|                                   |           |           | LYS      | 48    | 0.40             |
|                                   |           |           | PHE      | 50    | 0.40             |
|                                   |           |           | ASP      | 58    | 2.18             |
|                                   |           |           | LYS      | 68    | −0.10            |
| IgG1- $\kappa$ D1.3 Fv/E5.2 Fv    | 1DVF      | [53]      | HIS      | 30    | 1.70             |
|                                   |           |           | TYR      | 32    | 2.00             |
|                                   |           |           | TYR      | 49    | 1.70             |
|                                   |           |           | TYR      | 50    | 0.70             |
|                                   |           |           | TRP      | 92    | 0.30             |
|                                   |           |           | SER      | 93    | 1.20             |
|                                   |           |           | THR      | 30    | 0.90             |
|                                   |           |           | TYR      | 32    | 1.80             |
|                                   |           |           | TRP      | 52    | 4.20             |
|                                   |           |           | ASP      | 54    | 4.30             |
|                                   |           |           | ASN      | 56    | 1.20             |
|                                   |           |           | ASP      | 58    | 1.60             |
|                                   |           |           | GLU      | 98    | 4.20             |
|                                   |           |           | ARG      | 99    | 1.90             |
| $\alpha$ -Thrombin/thrombomodulin | 1DX5      | [54]      | ILE      | 24    | NS               |
|                                   |           |           | LYS      | 235   | NS               |
|                                   |           |           | PHE      | 34    | 2.60             |
|                                   |           |           | LYS      | 36    | NS               |
|                                   |           |           | PRO      | 37    | NS               |
|                                   |           |           | GLN      | 38    | NS               |
|                                   |           |           | GLU      | 39    | NS               |
|                                   |           |           | LEU      | 65    | NS               |
|                                   |           |           | ARG      | 67    | 3.4              |
|                                   |           |           | THR      | 74    | NS               |
|                                   |           |           | ARG      | 75    | NS               |
|                                   |           |           | TYR      | 76    | 3.00             |
|                                   |           |           | GLU      | 80    | HS               |
|                                   |           |           | LYS      | 81    | NS               |
|                                   |           |           | ILE      | 82    | 2.6              |
|                                   |           |           | MET      | 84    | 0.3              |
|                                   |           |           | LYS      | 110   | 0.00             |

Table S1. Cont.

| Complex                                    | CPX_PDBID | Reference | Mutation |       |                  |
|--------------------------------------------|-----------|-----------|----------|-------|------------------|
|                                            |           |           | Residue  | Chain | $\Delta\Delta G$ |
| HIV gp120/CD4                              | 1GC1      | [55]      | SER      | 23    | 0.29             |
|                                            |           |           | GLN      | 25    | 0.03             |
|                                            |           |           | HIS      | 27    | 0.28             |
|                                            |           |           | LYS      | 29    | 0.59             |
|                                            |           |           | ASN      | 32    | 0.18             |
|                                            |           |           | GLN      | 33    | 0.10             |
|                                            |           |           | LYS      | 35    | 0.32             |
|                                            |           |           | GLN      | 40    | −0.41            |
|                                            |           |           | SER      | 42    | 0.00             |
|                                            |           |           | LEU      | 44    | 1.04             |
|                                            |           |           | THR      | 45    | −0.15            |
|                                            |           |           | ASN      | 52    | 0.70             |
|                                            |           |           | ARG      | 59    | 1.16             |
|                                            |           |           | SER      | 60    | −0.09            |
|                                            |           |           | ASP      | 63    | −0.32            |
|                                            |           |           | GLN      | 64    | 0.44             |
|                                            |           |           | GLU      | 85    | 1.31             |
| Subtype N9 neuraminidase/<br>Antibody NC10 | 1NMB      | [56]      | ASP      | 56    | 2.80             |
|                                            |           |           | TYR      | 99    | 2.13             |
|                                            |           |           | THR      | 93    | 0.30             |
| IgG1- $\kappa$ D1.3 Fv/HEW lysozyme        | 1VFB      | [57]      | HIS      | 30    | 0.80             |
|                                            |           |           | TYR      | 32    | 1.30             |
|                                            |           |           | TYR      | 49    | 0.80             |
|                                            |           |           | TYR      | 50    | 0.40             |
|                                            |           |           | THR      | 53    | −0.23            |
|                                            |           |           | TRP      | 92    | 2.70             |
|                                            |           |           | SER      | 93    | 0.30             |
|                                            |           |           | THR      | 30    | 0.10             |
|                                            |           |           | TYR      | 32    | 0.50             |
|                                            |           |           | TRP      | 52    | 0.40             |
|                                            |           |           | ARG      | 99    | 0.10             |
|                                            |           |           | ASP      | 100   | 3.10             |
|                                            |           |           | TYR      | 101   | 4.00             |
|                                            |           |           | ASP      | 18    | 0.30             |
|                                            |           |           | ASN      | 19    | 0.30             |
|                                            |           |           | TYR      | 23    | 0.40             |
|                                            |           |           | SER      | 24    | 0.80             |
|                                            |           |           | LYS      | 116   | 0.70             |
|                                            |           |           | THR      | 118   | 0.80             |
|                                            |           |           | ASP      | 119   | 1.00             |
|                                            |           |           | VAL      | 120   | 0.90             |
|                                            |           |           | GLN      | 121   | 2.90             |
|                                            |           |           | ILE      | 124   | 1.20             |
|                                            |           |           | ARG      | 125   | 1.80             |
|                                            |           |           | LEU      | 129   | 0.20             |

Table S1. Cont.

| Complex                               | CPX_PDBID | Reference | Mutation |       |                  |
|---------------------------------------|-----------|-----------|----------|-------|------------------|
|                                       |           |           | Residue  | Chain | $\Delta\Delta G$ |
| HyHEL-10/HEW Lysozyme                 | 3HFM      | [58]      | SER      | 31    | 0.20             |
|                                       |           |           | ASP      | 32    | 2.00             |
|                                       |           |           | TYR      | 33    | 6.00             |
|                                       |           |           | TYR      | 50    | 7.50             |
|                                       |           |           | TYR      | 53    | 3.29             |
|                                       |           |           | TYR      | 58    | 1.70             |
|                                       |           |           | TYR      | 20    | 5.00             |
|                                       |           |           | ARG      | 21    | 1.00             |
|                                       |           |           | TRP      | 63    | 0.30             |
|                                       |           |           | ARG      | 73    | -0.20            |
|                                       |           |           | LEU      | 75    | 1.25             |
|                                       |           |           | THR      | 89    | 0.00             |
|                                       |           |           | ASN      | 93    | 0.60             |
|                                       |           |           | LYS      | 96    | 7.00             |
|                                       |           |           | LYS      | 97    | 6.00             |
|                                       |           |           | SER      | 100   | 0.25             |
|                                       |           |           | ASP      | 101   | 1.02             |
|                                       |           |           | HIS      | 15    | -0.50            |
|                                       |           |           | ASN      | 31    | 5.25             |
|                                       |           |           | ASN      | 32    | 5.20             |
|                                       |           |           | TYR      | 50    | 4.60             |
|                                       |           |           | GLN      | 53    | 1.00             |
|                                       |           |           | TYR      | 96    | 2.80             |
| Protein A/Z/IgG1 MO61 Fc              | 1FC2      | [59]      | ASN      | 147   | 0.60             |
|                                       |           |           | ILE      | 150   | 2.20             |
|                                       |           |           | LYS      | 154   | 1.20             |
| Ribonuclease A/Ribonuclease inhibitor | 1DFJ      | [60]      | GLU      | 202   | 1.00             |
|                                       |           |           | TRP      | 257   | 1.30             |
|                                       |           |           | TRP      | 259   | 2.20             |
|                                       |           |           | GLU      | 283   | 1.30             |
|                                       |           |           | SER      | 285   | 0.80             |
|                                       |           |           | TRP      | 314   | 1.00             |
|                                       |           |           | LYS      | 316   | 1.30             |
|                                       |           |           | GLU      | 340   | 1.60             |
|                                       |           |           | GLU      | 397   | 1.30             |
|                                       |           |           | TYR      | 430   | 5.90             |
|                                       |           |           | ASP      | 431   | 3.60             |
|                                       |           |           | TYR      | 433   | 2.60             |
|                                       |           |           | ARG      | 453   | 0.80             |
|                                       |           |           | GLU      | 202   | 1.00             |
|                                       |           |           | TRP      | 257   | 1.30             |

Table S1. Cont.

| Complex                                     | CPX_PDBID | Reference | Mutation |       |                  |
|---------------------------------------------|-----------|-----------|----------|-------|------------------|
|                                             |           |           | Residue  | Chain | $\Delta\Delta G$ |
| Integrin $\alpha 2$ I domain/collagen       | 1DZI      | [61]      | ASN      | 154   | NS               |
|                                             |           |           | TYR      | 157   | NS               |
|                                             |           |           | GLN      | 215   | HS               |
|                                             |           |           | ASP      | 219   | NS               |
|                                             |           |           | LEU      | 220   | NS               |
|                                             |           |           | THR      | 221   | HS               |
|                                             |           |           | GLU      | 256   | NS               |
|                                             |           |           | HIS      | 258   | NS               |
| BMP-2/BMP receptor IA extracellular domains | 1ES7      | [62]      | PHE      | 49    | NS               |
|                                             |           |           | PRO      | 50    | NS               |
|                                             |           |           | VAL      | 26    | NS               |
|                                             |           |           | TRP      | 31    | HS               |
| NIDOGEN-1/PERLECAN IG3                      | 1GL4      | [63]      | ARG      | 403   | NS               |
|                                             |           |           | ASP      | 427   | HS               |
|                                             |           |           | HIS      | 429   | HS               |
|                                             |           |           | TYR      | 431   | HS               |
|                                             |           |           | TYR      | 440   | NS               |
|                                             |           |           | GLU      | 616   | HS               |
|                                             |           |           | ARG      | 620   | HS               |
| MazE (antidote)/MazF (toxin)                | 1UB4      | [64]      | PHE      | 453   | NS               |
|                                             |           |           | LEU      | 455   | HS               |
|                                             |           |           | LEU      | 458   | HS               |
| IGG1 FC/streptococcal protein G             | 1FCC      | [65]      | THR      | 25    | 0.24             |
|                                             |           |           | GLU      | 27    | >4.90            |
|                                             |           |           | LYS      | 28    | 1.30             |
|                                             |           |           | LYS      | 31    | 3.50             |
|                                             |           |           | ASN      | 35    | NS               |
|                                             |           |           | ASP      | 40    | 0.30             |
|                                             |           |           | GLU      | 42    | 0.40             |
|                                             |           |           | TRP      | 43    | 3.80             |
| Oligomerization domain of P53               | 3SAK      | [66]      | GLU      | 8     | NS               |
|                                             |           |           | PHE      | 10    | HS               |
|                                             |           |           | THR      | 11    | NS               |
|                                             |           |           | LEU      | 12    | HS               |
|                                             |           |           | GLN      | 13    | NS               |
|                                             |           |           | ILE      | 14    | HS               |
|                                             |           |           | ARG      | 15    | NS               |
|                                             |           |           | ARG      | 17    | NS               |
|                                             |           |           | PHE      | 20    | HS               |
|                                             |           |           | PHE      | 23    | HS               |
|                                             |           |           | LEU      | 26    | HS               |
|                                             |           |           | ASN      | 27    | NS               |
|                                             |           |           | LEU      | 30    | HS               |
|                                             |           |           | ASP      | 34    | NS               |

Table S1. Cont.

| Complex                                                | CPX_PDBID | Reference | Mutation |       |                  |
|--------------------------------------------------------|-----------|-----------|----------|-------|------------------|
|                                                        |           |           | Residue  | Chain | $\Delta\Delta G$ |
| Factor VIIA/Tissue factor                              | 1FAK      | [67]      | ASN      | 37    | NS               |
|                                                        |           |           | LYS      | 41    | NS               |
|                                                        |           |           | SER      | 42    | NS               |
|                                                        |           |           | ASP      | 44    | NS               |
|                                                        |           |           | TYR      | 94    | NS               |
|                                                        |           |           | LYS      | 15    | −0.40            |
|                                                        |           |           | THR      | 17    | 0.10             |
|                                                        |           |           | ASN      | 18    | 0.20             |
|                                                        |           |           | LYS      | 20    | 2.60             |
|                                                        |           |           | ILE      | 22    | 1.70             |
|                                                        |           |           | GLU      | 24    | NS               |
|                                                        |           |           | SER      | 47    | 0.10             |
|                                                        |           |           | LYS      | 48    | 0.40             |
|                                                        |           |           | PHE      | 50    | 0.40             |
|                                                        |           |           | ASP      | 58    | 2.50             |
|                                                        |           |           | GLU      | 128   | 0.10             |
|                                                        |           |           | LEU      | 133   | 0.10             |
|                                                        |           |           | ARG      | 135   | 0.50             |
|                                                        |           |           | PHE      | 140   | 1.30             |
|                                                        |           |           | THR      | 203   | 0.10             |
|                                                        |           |           | VAL      | 207   | NS               |
| Subtilisin BPN' precursor/<br>chymotrypsin inhibitor 2 | 1TM1      | [68]      | THR      | 58    | 2.64             |
|                                                        |           |           | MET      | 59    | 1.02             |
|                                                        |           |           | GLU      | 60    | 2.98             |
|                                                        |           |           | TYR      | 61    | 2.57             |
|                                                        |           |           | ARG      | 62    | 1.25             |
|                                                        |           |           | ARG      | 65    | 3.40             |
|                                                        |           |           | ARG      | 67    | 2.99             |
|                                                        |           |           | VAL      | 70    | 0.02             |
| Interleukin-4/Interleukin-4<br>receptor $\alpha$ chain | 1IAR      | [69]      | ILE      | 5     | 0.22             |
|                                                        |           |           | THR      | 6     | 1.17             |
|                                                        |           |           | GLN      | 8     | −0.10            |
|                                                        |           |           | ILE      | 11    | −0.22            |
|                                                        |           |           | THR      | 13    | 0.07             |
|                                                        |           |           | ASN      | 15    | 0.97             |
|                                                        |           |           | SER      | 16    | −0.03            |
|                                                        |           |           | GLU      | 19    | −0.18            |
|                                                        |           |           | LYS      | 77    | −0.32            |
|                                                        |           |           | GLN      | 78    | 0.15             |
|                                                        |           |           | ARG      | 81    | 0.12             |
|                                                        |           |           | PHR      | 82    | 0.48             |
|                                                        |           |           | LYS      | 84    | −0.90            |
|                                                        |           |           | ARG      | 85    | 0.34             |
|                                                        |           |           | ARG      | 88    | 0.42             |
|                                                        |           |           | ASN      | 89    | 3.74             |
|                                                        |           |           | TRP      | 91    | 1.55             |

Table S1. Cont.

| Complex                                                            | CPX_PDBID | Reference | Mutation |       |                  |
|--------------------------------------------------------------------|-----------|-----------|----------|-------|------------------|
|                                                                    |           |           | Residue  | Chain | $\Delta\Delta G$ |
| 14.3.3 D T cell antigen receptor/<br>Staphylococcal enterotoxin C3 | 1JCK      | [70]      | THR      | 20    | 1.65             |
|                                                                    |           |           | TYR      | 26    | 1.77             |
|                                                                    |           |           | ASN      | 60    | 1.64             |
|                                                                    |           |           | TYR      | 90    | 2.89             |
|                                                                    |           |           | VAL      | 91    | 2.22             |
|                                                                    |           |           | LYS      | 103   | 0.67             |
|                                                                    |           |           | PHE      | 176   | 2.13             |
| Growth factor receptor-bound protein<br>2/Vav proto-oncogene       | 1GCQ      | [71]      | PRO      | 595   | 0.76             |
|                                                                    |           |           | PRO      | 608   | 1.31             |
|                                                                    |           |           | PRO      | 609   | 0.12             |
|                                                                    |           |           | PRO      | 657   | 0.08             |
|                                                                    |           |           | PRO      | 485   | 2.44             |
|                                                                    |           |           | VAL      | 486   | 2.35             |
| Cyclophilin A/HIV-1 capsid                                         | 1AK4      | [72]      | HIS      | 487   | 2.36             |
|                                                                    |           |           | GLY      | 489   | 3.43             |
|                                                                    |           |           | PRO      | 490   | 3.52             |
|                                                                    |           |           | ILE      | 491   | 1.60             |
|                                                                    |           |           | PRO      | 493   | 2.04             |
| ATF-urokinase receptor                                             | 2I9B      | [73]      | ARG      | 137   | −0.29            |
|                                                                    |           |           | LYS      | 139   | 0.67             |
|                                                                    |           |           | ARG      | 142   | 0.36             |
|                                                                    |           |           | HIS      | 143   | 0.66             |
|                                                                    |           |           | ARG      | 145   | 0.41             |
| Lyzozyme C/inhibitor                                               | 1UUZ      | [74]      | CYS      | 64    | 0.65             |
| Mlc/ EIICB                                                         | 3BP8      | [75]      | PHE      | 136   | 0.71             |
| IMME2/ E9 DNASE                                                    | 2WPT      | [76]      | GLU      | 30    | 1.73             |
|                                                                    |           |           | VAL      | 37    | 3.79             |
|                                                                    |           |           | GLU      | 41    | 4.48             |
|                                                                    |           |           | SER      | 50    | 2.42             |
|                                                                    |           |           | PRO      | 56    | 2.92             |
|                                                                    |           |           | ARG      | 54    | 0.87             |
|                                                                    |           |           | ASN      | 72    | 0.70             |
|                                                                    |           |           | SER      | 74    | −0.13            |
|                                                                    |           |           | ASN      | 75    | 1.25             |
|                                                                    |           |           | SER      | 77    | −0.46            |
|                                                                    |           |           | SER      | 78    | −0.09            |
|                                                                    |           |           | SER      | 84    | −0.07            |
|                                                                    |           |           | PHE      | 86    | 1.05             |
|                                                                    |           |           | THR      | 87    | 0.38             |
|                                                                    |           |           | GLN      | 92    | 0.38             |
| Cytochrome C peroxidase/<br>Cytochrome C                           | 2PCC      | [77]      | LYS      | 97    | 0.65             |
|                                                                    |           |           | VAL      | 98    | 0.26             |
|                                                                    |           |           | ASP      | 34    | −0.89            |
|                                                                    |           |           | VAL      | 197   | 2.09             |
|                                                                    |           |           | GLU      | 290   | 6.18             |
|                                                                    |           |           | LYS      | 87    | 0.90             |



Table S1. Cont.

| Complex                  | CPX_PDBID | Reference | Mutation |       |                  |
|--------------------------|-----------|-----------|----------|-------|------------------|
|                          |           |           | Residue  | Chain | $\Delta\Delta G$ |
| JEL42 FAB/HPR            | 2JEL      | [78]      | THR      | 62    | 0.00             |
|                          |           |           | GLU      | 68    | 0.41             |
|                          |           |           | GLU      | 70    | 2.72             |
|                          |           |           | HIS      | 76    | −0.41            |
|                          |           |           | GLU      | 83    | 0.00             |
| Nuclease A/inhibitor     | 2O3B      | [79]      | GLU      | 24    | 5.45             |
|                          |           |           | GLN      | 74    | 3.22             |
|                          |           |           | TRP      | 76    | 4.06             |
| Profilin/ $\beta$ -Actin | 2BTF      | [80]      | PHE      | 59    | 4.27             |
|                          |           |           | LYS      | 125   | 0.00             |
| UCHL3/UbVME              | 1XD3      | [81]      | LYS      | 6     | 1.64             |
|                          |           |           | LEU      | 8     | 2.10             |
|                          |           |           | GLU      | 24    | 1.59             |
|                          |           |           | LYS      | 27    | 0.46             |
|                          |           |           | ASP      | 39    | 1.34             |
|                          |           |           | ILE      | 44    | 2.47             |
|                          |           |           | GLU      | 51    | −0.24            |
|                          |           |           | ASP      | 52    | −0.06            |
|                          |           |           | ASP      | 58    | −0.41            |
| TSG101(UEV)/ubiquitin    | 1S1Q      | [82]      | VAL      | 43    | 0.67             |
|                          |           |           | PHE      | 44    | 0.20             |
|                          |           |           | ASN      | 45    | 1.23             |
|                          |           |           | ASP      | 46    | 0.96             |
|                          |           |           | TRP      | 75    | 0.27             |
|                          |           |           | PHE      | 88    | 0.77             |
| RALGDS/RAS               | 1LFD      | [83]      | ARG      | 20    | 1.13             |
|                          |           |           | LYS      | 32    | 1.32             |
|                          |           |           | LYS      | 48    | 0.26             |
|                          |           |           | ASP      | 51    | −0.58            |
|                          |           |           | LYS      | 52    | 1.17             |
|                          |           |           | ASP      | 56    | −0.28            |
|                          |           |           | GLU      | 57    | −0.25            |

Table S1. Cont.

| Complex                      | CPX_PDBID | Reference | Mutation |       |                  |
|------------------------------|-----------|-----------|----------|-------|------------------|
|                              |           |           | Residue  | Chain | $\Delta\Delta G$ |
| TGF-BETA3/ TBR-2             | 1KTZ      | [84]      | ARG      | 25    | 1.48             |
|                              |           |           | ARG      | 94    | 2.87             |
|                              |           |           | LEU      | 27    | 2.26             |
|                              |           |           | PHE      | 30    | 3.41             |
|                              |           |           | ASP      | 32    | 1.96             |
|                              |           |           | ASN      | 47    | 0.72             |
|                              |           |           | SER      | 49    | 0.78             |
|                              |           |           | ILE      | 50    | 2.33             |
|                              |           |           | THR      | 51    | 1.95             |
|                              |           |           | SER      | 52    | 0.66             |
|                              |           |           | ILE      | 53    | 1.81             |
|                              |           |           | GLU      | 55    | 1.66             |
|                              |           |           | VAL      | 62    | 1.09             |
|                              |           |           | GLU      | 75    | 1.52             |
|                              |           |           | VAL      | 77    | 0.86             |
|                              |           |           | HIS      | 79    | 0.74             |
|                              |           |           | PHE      | 110   | 1.37             |
|                              |           |           | MET      | 112   | 1.31             |
| AML1/CBF-BETA                | 1H9D      | [85]      | ASP      | 118   | 1.26             |
|                              |           |           | GLU      | 119   | 1.93             |
|                              |           |           | ILE      | 125   | 0.98             |
|                              |           |           | ARG      | 3     | 1.16             |
|                              |           |           | VAL      | 4     | 1.40             |
|                              |           |           | GLY      | 61    | 2.07             |
| Chemotaxis protein Chey/Chea | 1FFW      | [86]      | GLN      | 67    | 1.36             |
|                              |           |           | LEU      | 103   | 0.94             |
|                              |           |           | ASN      | 104   | 2.29             |
|                              |           |           | GLU      | 171   | 0.71             |
|                              |           |           | GLU      | 178   | 0.64             |
|                              |           |           | HIS      | 181   | 0.03             |
|                              |           |           | ASP      | 202   | −0.07            |
|                              |           |           | ASP      | 207   | 0.10             |
|                              |           |           | CYS      | 213   | 0.20             |
|                              |           |           | PHE      | 214   | 3.63             |
|                              |           |           | ILE      | 216   | 0.43             |

Table S1. Cont.

| Complex                         | CPX_PDBID | Reference | Mutation |       |                  |
|---------------------------------|-----------|-----------|----------|-------|------------------|
|                                 |           |           | Residue  | Chain | $\Delta\Delta G$ |
| MT-SP1/ S4 FAB                  | 3NPS      | [87]      | GLN      | 38    | 0.03             |
|                                 |           |           | ILE      | 41    | 0.64             |
|                                 |           |           | ARG      | 87    | −0.15            |
|                                 |           |           | PHE      | 94    | 1.59             |
|                                 |           |           | ASN      | 95    | 0.25             |
|                                 |           |           | ASP      | 96    | 1.50             |
|                                 |           |           | PHE      | 97    | 0.46             |
|                                 |           |           | THR      | 98    | 0.72             |
|                                 |           |           | HIS      | 143   | 1.87             |
|                                 |           |           | GLN      | 145   | 0.29             |
|                                 |           |           | TYR      | 146   | 1.77             |
|                                 |           |           | THR      | 150   | 0.17             |
|                                 |           |           | GLU      | 169   | 0.61             |
|                                 |           |           | GLN      | 177   | −0.06            |
|                                 |           |           | GLN      | 175   | 0.74             |
|                                 |           |           | ASP      | 217   | 1.46             |
|                                 |           |           | ARG      | 222   | −0.08            |
|                                 |           |           | LYS      | 224   | −0.10            |
| $\beta$ -Trypsin/BPTI           | 2FTL      | [88]      | GLY      | 12    | 4.37             |
|                                 |           |           | LYS      | 15    | 10.36            |
|                                 |           |           | ILE      | 18    | 5.00             |
|                                 |           |           | GLY      | 36    | 2.01             |
| RNASE 1/RNASE inhibitor         | 1Z7X      | [89]      | GLU      | 206   | 1.01             |
|                                 |           |           | TRP      | 261   | 1.33             |
|                                 |           |           | TRP      | 263   | 2.20             |
|                                 |           |           | GLU      | 287   | 1.32             |
|                                 |           |           | SER      | 289   | 0.81             |
|                                 |           |           | TRP      | 318   | 0.99             |
|                                 |           |           | LYS      | 320   | 1.32             |
|                                 |           |           | GLU      | 344   | 1.56             |
|                                 |           |           | TRP      | 375   | 1.66             |
|                                 |           |           | GLU      | 401   | 1.30             |
|                                 |           |           | TYR      | 434   | 5.93             |
|                                 |           |           | ASP      | 435   | 3.65             |
|                                 |           |           | TYR      | 437   | 2.61             |
| Human leukocyte elastase/OMTKY3 | 1PPF      | [90]      | ARG      | 457   | 0.84             |
|                                 |           |           | ILE      | 459   | 0.34             |
|                                 |           |           | LYS      | 13    | 0.75             |
|                                 |           |           | PRO      | 14    | −0.12            |
|                                 |           |           | THR      | 17    | 3.18             |
|                                 |           |           | LEU      | 18    | 1.01             |
|                                 |           |           | GLU      | 19    | 1.20             |
|                                 |           |           | TYR      | 20    | 3.20             |
|                                 |           |           | ARG      | 21    | 0.21             |
|                                 |           |           | GLY      | 32    | 0.26             |
|                                 |           |           | ASN      | 36    | −1.64            |

Table S1. Cont.

| Complex                                                    | CPX_PDBID | Reference | Mutation |       |                  |
|------------------------------------------------------------|-----------|-----------|----------|-------|------------------|
|                                                            |           |           | Residue  | Chain | $\Delta\Delta G$ |
| Proteinase B/OMTKY3                                        | 3SGB      | [91]      | LYS      | 13    | −2.56            |
|                                                            |           |           | PRO      | 14    | −0.19            |
|                                                            |           |           | THR      | 17    | 3.40             |
|                                                            |           |           | LEU      | 18    | 2.96             |
|                                                            |           |           | GLU      | 19    | 1.02             |
|                                                            |           |           | TYR      | 20    | 1.94             |
|                                                            |           |           | ARG      | 21    | 0.05             |
|                                                            |           |           | GLY      | 32    | 1.29             |
|                                                            |           |           | ASN      | 36    | 0.33             |
| Efb-C/C3d                                                  | 2GOX      | [92]      | ARG      | 131   | 2.25             |
|                                                            |           |           | ASN      | 138   | 1.57             |
| Interstitial collagenase/<br>Metalloproteinase inhibitor 1 | 2J0T      | [93]      | VAL      | 4     | 0.00             |
|                                                            |           |           | SER      | 68    | 2.11             |
|                                                            |           |           | THR      | 2     | 4.29             |
|                                                            |           |           | MET      | 66    | 1.64             |
| Bone morphogenetic protein 2/<br>Crossveinless 2           | 3BK3      | [94]      | LEU      | 1     | 0.00             |
|                                                            |           |           | ILE      | 2     | 1.04             |
|                                                            |           |           | ILE      | 18    | 0.49             |
|                                                            |           |           | ILE      | 21    | 1.31             |
|                                                            |           |           | ILE      | 27    | 1.26             |
| Membrane-type serine protease 1/BPTI                       | 1EAW      | [95]      | GLN      | 38    | −0.52            |
|                                                            |           |           | ILE      | 41    | −0.82            |
|                                                            |           |           | ILE      | 60    | −0.19            |
|                                                            |           |           | ASP      | 60A   | −0.17            |
|                                                            |           |           | ASP      | 60B   | 1.50             |
|                                                            |           |           | ARG      | 60C   | 0.59             |
|                                                            |           |           | PHE      | 60E   | −0.43            |
|                                                            |           |           | ARG      | 60F   | 0.23             |
|                                                            |           |           | TYR      | 60G   | −0.08            |
|                                                            |           |           | ARG      | 87    | −0.15            |
|                                                            |           |           | PHE      | 94    | 0.73             |
|                                                            |           |           | ASN      | 95    | 0.31             |
|                                                            |           |           | ASP      | 96    | 0.65             |
|                                                            |           |           | PHE      | 97    | 0.89             |
|                                                            |           |           | THR      | 98    | 0.25             |
|                                                            |           |           | HIS      | 143   | −0.01            |
|                                                            |           |           | GLN      | 145   | 0.31             |
|                                                            |           |           | TYR      | 146   | 0.50             |
|                                                            |           |           | THR      | 150   | 0.09             |
|                                                            |           |           | LEU      | 153   | 0.50             |
|                                                            |           |           | GLU      | 169   | 0.70             |
|                                                            |           |           | GLN      | 174   | 0.56             |
|                                                            |           |           | GLN      | 175   | −0.13            |
|                                                            |           |           | ASP      | 217   | 2.23             |
|                                                            |           |           | GLN      | 221A  | 0.14             |
|                                                            |           |           | ARG      | 222   | −0.09            |
|                                                            |           |           | LYS      | 224   | 0.48             |

Table S1. Cont.

| Complex                                   | CPX_PDBID | Reference | Mutation |       |                  |
|-------------------------------------------|-----------|-----------|----------|-------|------------------|
|                                           |           |           | Residue  | Chain | $\Delta\Delta G$ |
| Membrane-type serine protease<br>1/E2 Fab | 3BN9      | [96]      | GLN      | 38    | −0.42            |
|                                           |           |           | ILE      | 41    | 0.00             |
|                                           |           |           | ILE      | 60    | 0.84             |
|                                           |           |           | ASP      | 60a   | 0.42             |
|                                           |           |           | ASP      | 60b   | 0.31             |
|                                           |           |           | ARG      | 60c   | −0.04            |
|                                           |           |           | PHE      | 60e   | −0.04            |
|                                           |           |           | ARG      | 60f   | −0.07            |
|                                           |           |           | TYR      | 60g   | 0.02             |
|                                           |           |           | ARG      | 87    | −0.16            |
|                                           |           |           | PHE      | 94    | 0.64             |
|                                           |           |           | ASN      | 95    | 0.77             |
|                                           |           |           | THR      | 98    | 1.13             |
|                                           |           |           | HIS      | 143   | 0.09             |
|                                           |           |           | GLN      | 145   | 0.13             |
|                                           |           |           | TYR      | 146   | 1.08             |
|                                           |           |           | THR      | 150   | 0.29             |
|                                           |           |           | LEU      | 153   | 0.34             |
|                                           |           |           | GLU      | 169   | 0.37             |
|                                           |           |           | GLN      | 174   | −0.03            |
|                                           |           |           | GLN      | 175   | 2.51             |
|                                           |           |           | ASP      | 217   | 0.57             |
|                                           |           |           | GLN      | 221a  | 0.71             |
|                                           |           |           | ARG      | 222   | −0.09            |
|                                           |           |           | LYS      | 224   | 0.78             |
| HyHEL-63 Fab/HEW Lysozyme                 | 1DQJ      | [97]      | TYR      | 20    | 3.29             |
|                                           |           |           | ARG      | 21    | 1.21             |
|                                           |           |           | LYS      | 97    | 3.52             |
|                                           |           |           | ASP      | 101   | 1.45             |
|                                           |           |           | TRP      | 62    | 0.76             |
|                                           |           |           | TRP      | 63    | 1.35             |
|                                           |           |           | LEU      | 75    | 1.45             |
|                                           |           |           | THR      | 89    | 0.84             |
|                                           |           |           | ASN      | 93    | 0.65             |
|                                           |           |           | LYS      | 96    | 6.16             |
|                                           |           |           | LYS      | 97    | 3.52             |
|                                           |           |           | SER      | 100   | 0.78             |
|                                           |           |           | ASP      | 101   | 1.30             |
|                                           |           |           | ASN      | 31    | 2.01             |
|                                           |           |           | ASN      | 32    | 4.09             |
|                                           |           |           | TYR      | 50    | 2.68             |
|                                           |           |           | SER      | 91    | 1.43             |
|                                           |           |           | TYR      | 96    | 1.14             |
|                                           |           |           | ASP      | 32    | 2.01             |
|                                           |           |           | TYR      | 33    | 5.52             |
|                                           |           |           | TYR      | 50    | 6.89             |
|                                           |           |           | TYR      | 53    | 1.18             |
|                                           |           |           | TRP      | 98    | 4.93             |

Table S1. Cont.

| Complex                                                         | CPX_PDBID | Reference | Mutation |       |                  |
|-----------------------------------------------------------------|-----------|-----------|----------|-------|------------------|
|                                                                 |           |           | Residue  | Chain | $\Delta\Delta G$ |
| SHV-1 $\beta$ -lactamase/BLIP                                   | 2G2U      | [98]      | GLU      | 31    | 0.65             |
|                                                                 |           |           | SER      | 35    | −0.95            |
|                                                                 |           |           | PHE      | 36    | 2.76             |
|                                                                 |           |           | SER      | 39    | −0.96            |
|                                                                 |           |           | HIS      | 41    | 1.72             |
|                                                                 |           |           | GLY      | 48    | −0.43            |
|                                                                 |           |           | TYR      | 50    | −2.07            |
|                                                                 |           |           | TYR      | 51    | −0.63            |
|                                                                 |           |           | TYR      | 53    | 2.30             |
|                                                                 |           |           | SER      | 71    | −0.51            |
|                                                                 |           |           | GLU      | 73    | −1.98            |
|                                                                 |           |           | LYS      | 74    | −0.22            |
|                                                                 |           |           | TRP      | 112   | 0.96             |
|                                                                 |           |           | SER      | 113   | −0.61            |
|                                                                 |           |           | GLY      | 141   | −0.41            |
|                                                                 |           |           | PHE      | 142   | 0.28             |
|                                                                 |           |           | TYR      | 143   | −1.85            |
|                                                                 |           |           | ARG      | 144   | −0.34            |
|                                                                 |           |           | HIS      | 148   | 1.12             |
|                                                                 |           |           | TRP      | 150   | 1.78             |
| Bovine $\alpha$ -chymotrypsin/<br>Turkey ovomucoid third domain | 1CHO      | [99]      | ARG      | 160   | 0.67             |
|                                                                 |           |           | TRP      | 162   | 0.53             |
|                                                                 |           |           | SER      | 12    | 1.90             |
|                                                                 |           |           | THR      | 10    | 2.05             |
|                                                                 |           |           | ILE      | 13    | 3.51             |
|                                                                 |           |           | GLY      | 32    | −0.77            |
|                                                                 |           |           | THR      | 17    | 4.32             |
|                                                                 |           |           | LEU      | 18    | 4.93             |
